# Supplementary material
Source: MDPI journal article supplement (https://www.mdpi.com/2304-6740/4/4/36)
Supplement: s1 [file s1]

# Supplementary Materials: *PP*-Rotation, *P*-Inversion and Metathesis in Diphosphines Studied by DFT Calculations: Comments on Some Literature Conflicts

Adam D. Molloy, Goar Sánchez-Sanz and Declan G. Gilheany

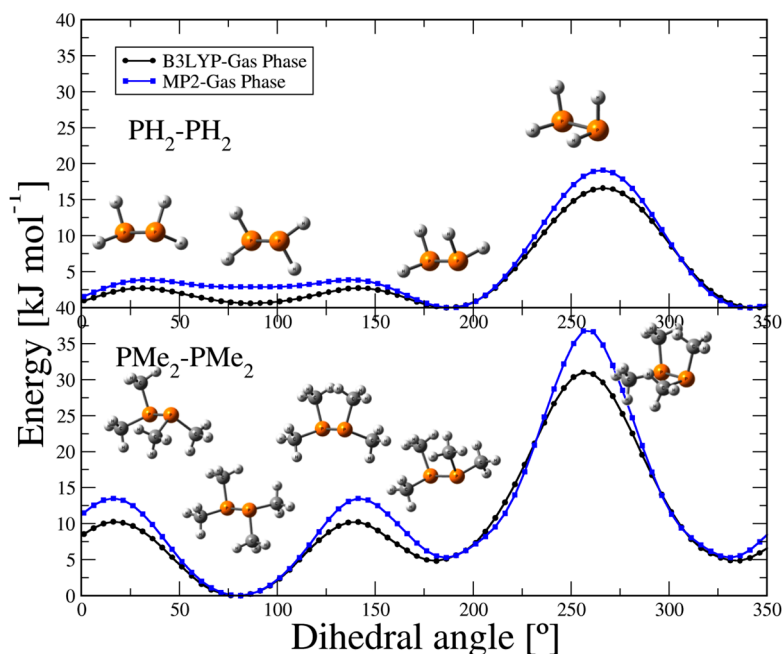

**Figure S1.** PES for  $\text{H}_4\text{P}_2$  and  $\text{Me}_4\text{P}_2$ , corresponding to the rotation along the molecular axis, at MP2 and B3LYP/6-311++G(d,p) computational level in gas phase. Orange, grey and white atoms corresponds to P, C and H atoms respectively.

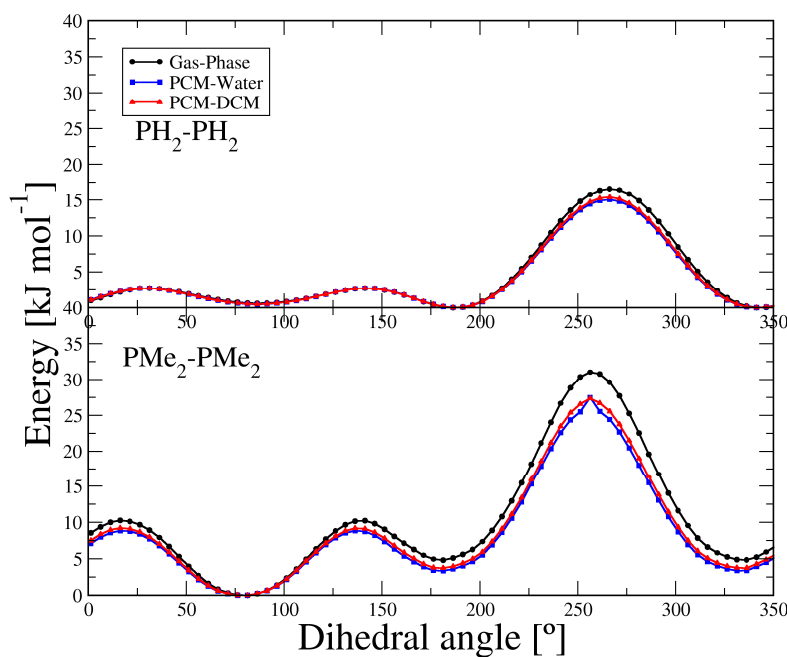

**Figure S2.** PES for  $\text{H}_4\text{P}_2$  and  $\text{Me}_4\text{P}_2$ , corresponding to the rotation along the molecular axis and B3LYP/6-311++G(d,p), gas phase, PCM-Water and PCM-DCM.

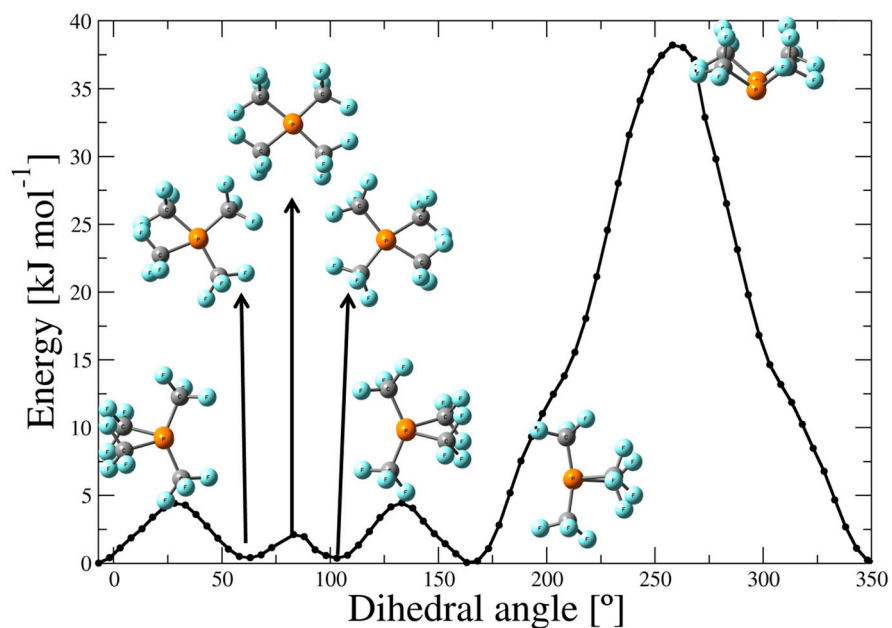

**Figure S3.** PES for  $(\text{CF}_3)_4\text{P}_2$  corresponding to the rotation along the molecular axis and B3LYP/6-311++G(d,p)/PCM-DCM.

**Table S1.** Relative energies of *anti* and *gauche* conformers of  $\text{H}_4\text{P}_2$ ,  $\text{Me}_4\text{P}_2$ , and  $(\text{CF}_3)_2\text{P}_2$  systems at the B3LYP/6-311++G(d,p), M06-2X/6-311++G(d,p) and M06-2X/aug-cc-pVTZ computational level.

| B3LYP/6-311++G(d,p) | M06-2X/6-311++G(d,p) | M06-2X/aug-cc-pVTZ |
|---------------------|----------------------|--------------------|
| 0.9                 | -1.1                 | -0.8               |
| 4.4                 | 5.7                  | 6.3                |
| 1.5                 | 1.4                  | 3.2                |
